# Supplementary material for: Identification of Isopeptides Between Human Tissue Transglutaminase and Wheat, Rye, and Barley Gluten Peptides
Source: PubMed Central journal article supplement (PMC7198585; doi:10.1038/s41598-020-64143-9), 2020-05-04
Supplement: 41598_2020_64143_MOESM1_ESM.pdf [file 41598_2020_64143_MOESM1_ESM.pdf]

# Identification of Isopeptides Between Human Tissue Transglutaminase and Wheat, Rye, and Barley Gluten Peptides

## Supplementary Material

Barbara Lexhaller<sup>1</sup>, Christina Ludwig<sup>2</sup>, Katharina Anne Scherf<sup>1,3\*</sup>

<sup>1</sup>Leibniz-Institute for Food Systems Biology at the Technical University of Munich, Lise-Meitner-Str. 34, 85354 Freising, Germany

<sup>2</sup>Bavarian Center for Biomolecular Mass Spectrometry (BayBioMS), Technical University of Munich, Gregor-Mendel-Str. 4, 85354 Freising, Germany

<sup>3</sup>Department of Bioactive and Functional Food Chemistry, Institute of Applied Biosciences, Karlsruhe Institute of Technology (KIT), Adenauerring 20a, 76131 Karlsruhe, Germany

**Table S1.** Number of identified proteins in each gluten protein type (GPT) blank sample.

| <b>GPTs wheat</b>     | <b>Number of protein entries in database</b> | <b>GPTs rye</b>        | <b>Number of protein entries in database</b> | <b>GPTs barley</b> | <b>Number of protein entries in database</b> |
|-----------------------|----------------------------------------------|------------------------|----------------------------------------------|--------------------|----------------------------------------------|
| HMW-GS                | 2233                                         | HMW-secalins           | 586                                          | D-hordeins         | 1673                                         |
| $\omega$ 1,2-gliadins | 2470                                         | $\omega$ -secalins     | 777                                          | C-hordeins         | 1103                                         |
| $\omega$ 5-gliadins   | 1167                                         |                        |                                              |                    |                                              |
| LMW-GS                | 2225                                         | $\gamma$ -75k-secalins | 807                                          | B-hordeins         | 903                                          |
| $\gamma$ -gliadins    | 2270                                         | $\gamma$ -40k-secalins | 1725                                         | $\gamma$ -hordeins | 745                                          |
| $\alpha$ -gliadins    | 2500                                         |                        |                                              |                    |                                              |

```

W1      -----WQIPEQSR-----
W12     -----WQTPEQSR-----
W2      -----AQIPQQL-----
R6      -----AQIPQHL-----
B8      -----PQQQFPQQQFHQ--QQL-----
W5      -----PQQTF--PQQPLF-----
W6      -----PQPPQQPF-----
W9      P--QQSEQVIPQQPQQPF-----
B4      IIPQQPQQPFPLQPHQPY-----
R3      -----QPQQPFPQQPQQSF-----
B7      -----PLQPQQPF PW-----
R5      -----QIPTPLQPQQPF-----
W8      -----QEQQIGQEQQPGQW-----
B3      -----PQQPGQW-----
B5      -----PQQPGQG--QQPGQR-----
B6      -----PQQPGQGQGQQGYYPGATSL
W13     -----VYYPTSPQQPGQL-----
W3      -----VQGQGI IQPQQPAQL-----
R2      -----AQVQGI IQPQQL-----
R1      I----VQGQSIIQ-QQPAQL-----
W10     -----QQQPPFWQ-QQPPF-----
B2      -----VQQQQPPF-----
W4      -----PYSQ--PQPF-----
W11     -----RPQQPYPQ--PQPQY-----
B9      -----FPQYQIPTPL-----
B1      -----QGQQGQQLGQG--QQGY-----

```

**Figure S1.** CLUSTAL format multiple sequence alignment of all non-deamidated gluten peptides involved in isopeptide formation with human transglutaminase 2 (MAFFT online version 7.452, Jan. 16, 2020).

```

W1          -----WQIPEQSR-----
W12         -----WQTPEQSR-----
W2          -----AQIPQQL-----
R6          -----AQIPQHL-----
B8          -----PEEQFPQQQFHEQQL-----
B8 '       -----PEEQFPQQQFHQEQL-----
W3          ---VQGEGIIQPQPPAQL-----
R2          ---AQVQGIIQPQQL-----
R1          I--VQGQSIIQ-EQPAQL-----
W5          -----PQQTFFPQQPL--F-----
R3          -----QPQQPFPPQQPEQSF-----
W6          -----PQPPQQPF-----
B4          -----IIPQQPQQPFPLQPHQPY-----
W9          PQQSEQVIPEQPQQPF-----
B7          -----PLQPQQPF PW-----
R5          ----QIPTPLQPQQPF-----
W8          ----EEEEIGEEQQPGQW-----
B3          -----PQQPGQW-----
W13         -----VYYPTSPQQPGQL-----
B6          -----PQQPGQEGGQQGYYPGATSL
B5          -----PEQPGQGQQPGQR-----
W10         -----EQQPPFWEQQPP-F-----
B2          -----VQQEQPPF-----
W4          -----PYSQPQP--F-----
W11        -----RPQQPYPPQPQPQ-Y-----
B9          -----FPQYEIPTPL-----
B1          -----QGQEGEQLGQGEQG--YY-----

```

**Figure S2.** CLUSTAL format multiple sequence alignment of all gluten peptides that are involved in isopeptide formation with human transglutaminase 2 considering the detected deamidation sites (MAFFT online version 7.452, Jan. 16, 2020).
